# Supplementary material
Source: publisher site journal article supplement (https://www.dovepress.com/get_supplementary_file.php?f=349028.docx)

Figure S1. The flow chart illustrating double-blind. There were six anesthesiologists, one urologist, and one anesthesiologist nurse. ○Open-label: Dr. Zhu YH and Dr. Liu XX; ●Blinding: Dr. Liu DX, Dr. Zhang GT, Dr. Xu S, Dr. He M, Dr. Chen SL and An K. PACU, post-anesthesia care unit


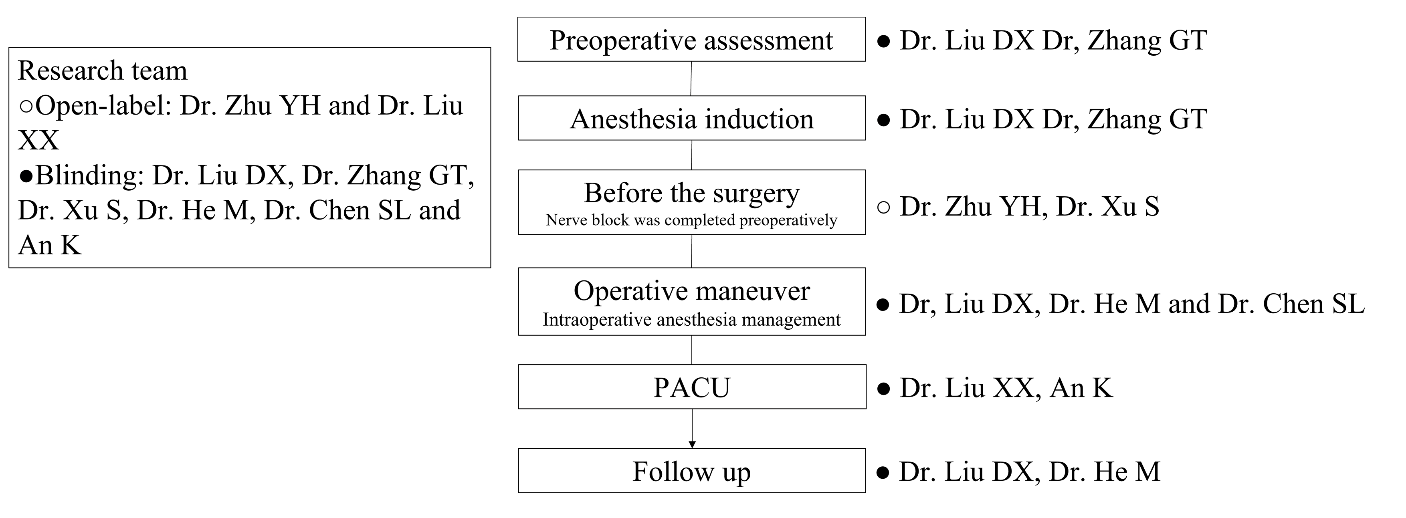


Figure S2. Comparison of skin temperature differences in the operation area. The data at 1 hour after block, 1 hour after surgery, and the end of surgery do not follow the normal distribution and are compared by the rank-sum test. The data at other time points follow the normal distribution and are expressed as mean ± standard deviation, and compared by t-test. All data are presented as mean ± standard deviation to display the data distribution clearly. RLB, retrolaminar block. ESPB, erector spine plane block. PACU, post-anesthesia care unit.


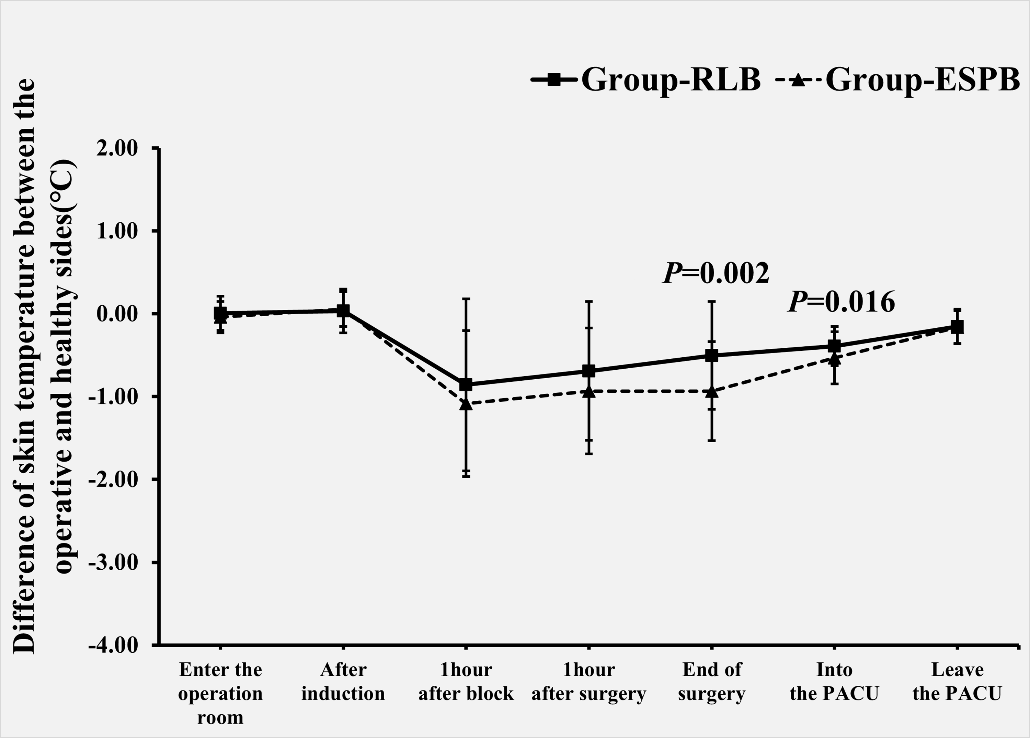


Figure S3. Comparison of postoperative inflammation levels. (A) IL-1β expressed as median (interquartile range), is lower in the RLB group than in the ESPB group. (B) PGE2 expressed as median (interquartile range) shows no significant difference between the two groups. Postoperative white blood cell count (C) and neutrophil percentage (D) are expressed as mean ± standard deviation, and the differences are not statistically significant. RLB, retrolaminar block. ESPB, erector spine plane block. IL-1β, serum interleukin-1β. PGE2, prostaglandin E2. WBC, white blood cell. NEUT, neutrophil percentage.


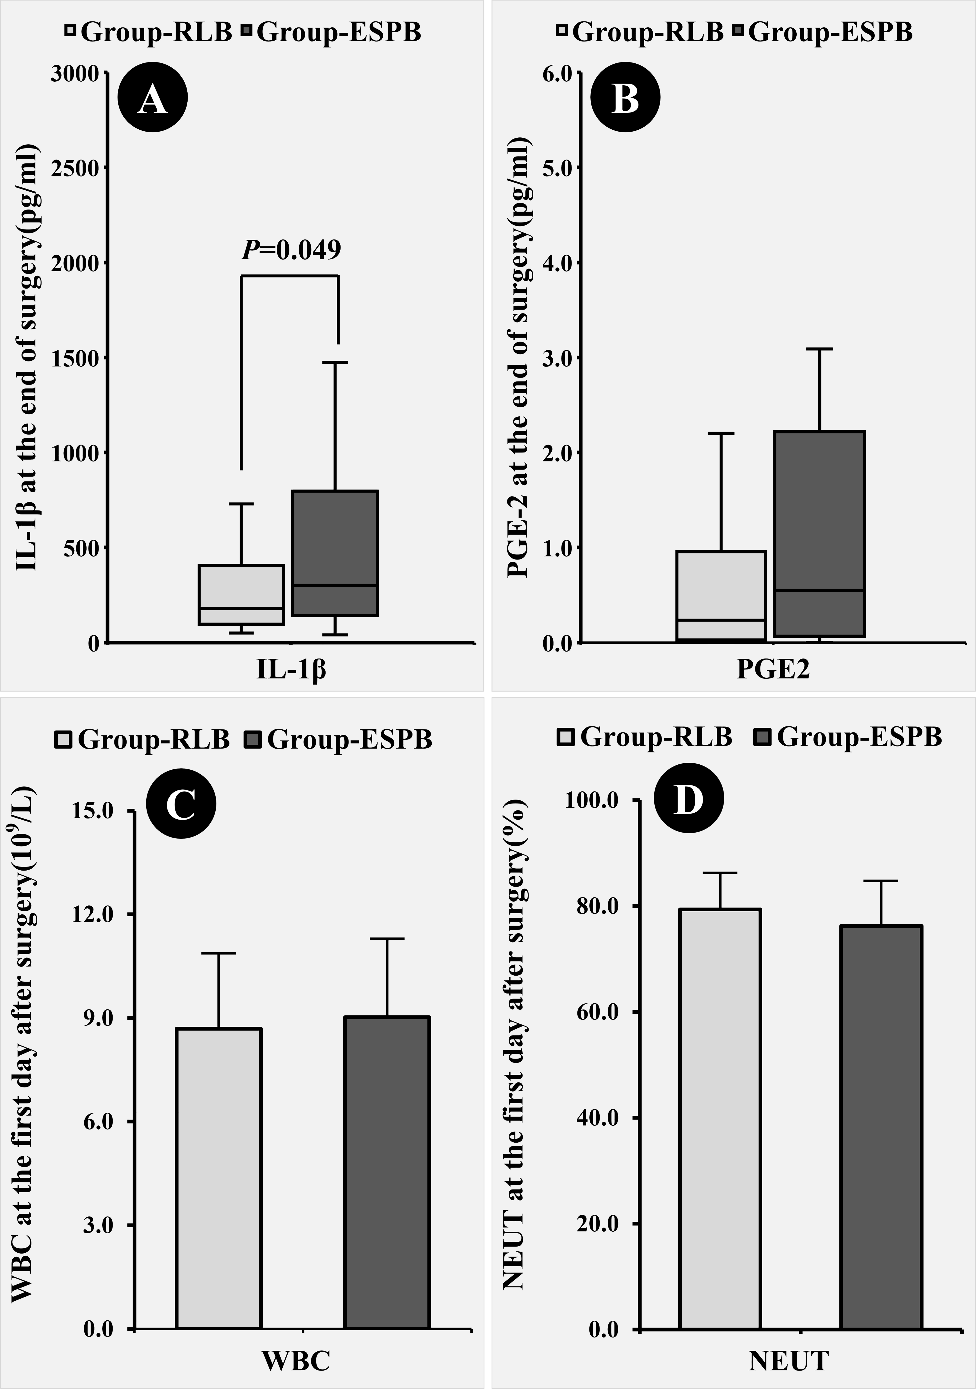

Supplement: Supplementary file 1 [file get_supplementary_file.php]
